# Supplementary material for: Effects of the Addition of Herbs on the Properties of Doenjang
Source: MDPI journal article supplement (doi:10.3390/foods10061307), 2021-06-07
Supplement: s1 [file s1]

**Supplementary Table 1. Discriminative Primary Metabolites analysed by GC–TOF-MS in doenjang made with three different herbs.**

| Compounds <sup>a</sup>                   | RT (min) <sup>b</sup> | Ms fragment ions (m/z)                                               | VIP1 <sup>c</sup> | VIP2 |
|------------------------------------------|-----------------------|----------------------------------------------------------------------|-------------------|------|
| <i><u>Organic acids</u></i>              |                       |                                                                      |                   |      |
| Lactic acid                              | 4.77                  | 73, 117, 147, 191, 75, 148, 190, 66, 133, 118, 74, 59                | 2.31              | 1.84 |
| Glycolic acid                            | 4.96                  | 73, 147, 66, 75, 148, 59, 177, 74, 133                               | 0.99              | 0.78 |
| Malonic acid                             | 6.38                  | 70, 147, 73, 86, 75, 148, 66, 149, 74                                | 1.12              | 0.93 |
| Succinic acid                            | 7.42                  | 147, 73, 75, 55, 148, 56, 149, 74, 129                               | 1.04              | 1.18 |
| Fumaric acid                             | 7.73                  | 73, 99, 147, 241, 75, 255, 126, 100, 113, 256, 245                   | 2.13              | 1.71 |
| Malic acid                               | 9.00                  | 73, 147, 75, 55, 133, 74, 101, 233                                   | 1.75              | 1.39 |
| Vanillic acid                            | 11.17                 | 73, 75, 174, 267, 297, 74, 59, 103, 223, 86, 126, 147                | 0.54              | 0.48 |
| Citric acid                              | 11.57                 | 73, 147, 75, 273, 74, 142, 59, 218, 174, 67, 133, 149, 148, 129, 265 | 1.85              | 1.74 |
| Quinic acid                              | 11.90                 | 73, 147, 75, 345, 174, 204, 74, 255, 103, 191, 133                   | 0.43              | 0.96 |
| <i><u>Amino acid</u></i>                 |                       |                                                                      |                   |      |
| Alanine                                  | 5.25                  | 73, 116, 147, 117, 75, 59, 74, 100                                   | 0.74              | 0.78 |
| Valine                                   | 6.47                  | 73, 100, 218, 147, 75, 74, 59, 133                                   | 0.21              | 0.91 |
| Leucine                                  | 7.03                  | 73, 158, 102, 100, 159, 116, 74, 75                                  | 0.23              | 0.85 |
| Isoleucine                               | 7.25                  | 73, 158, 100, 218, 147, 75, 74, 159, 59                              | 0.09              | 0.84 |
| Proline                                  | 7.29                  | 73, 142, 147, 143, 74, 75, 59, 216                                   | 0.25              | 0.95 |
| Serine                                   | 7.88                  | 73, 204, 218, 100, 147, 75, 74, 188, 116                             | 0.05              | 0.89 |
| Threonine                                | 8.13                  | 73, 117, 57, 101, 219, 218, 147, 75, 100                             | 0.07              | 0.98 |
| Pyroglutamic acid                        | 9.33                  | 73, 156, 147, 157, 75, 74, 230, 59, 258                              | 0.92              | 1.63 |
| GABA                                     | 9.34                  | 73, 156, 147, 174, 75, 157, 59, 86, 74, 100                          | 0.23              | 0.81 |
| Phenylalanine                            | 10.15                 | 73, 218, 192, 100, 147, 75, 74, 219, 91, 193                         | 0.06              | 0.82 |
| Tyrosine                                 | 12.38                 | 218, 147, 100, 103, 219, 117, 319, 148, 133                          | 1.14              | 1.12 |
| <i><u>Sugar &amp; sugar alcohols</u></i> |                       |                                                                      |                   |      |
| Xylose                                   | 10.41                 | 73, 103, 217, 147, 74, 75, 133, 307, 59                              | 1.83              | 1.47 |
| Lyxose                                   | 10.46                 | 103, 73, 147, 217, 189, 133, 160, 117, 129                           | 1.72              | 1.34 |
| Fructose                                 | 12.07                 | 73, 103, 217, 147, 74, 307, 89, 117                                  | 2.10              | 1.75 |
| Galactose                                | 12.14                 | 73, 103, 147, 205, 319                                               | 1.67              | 1.33 |
| Glucose                                  | 12.19                 | 73, 103, 147, 205, 319, 364                                          | 1.41              | 1.12 |
| N-Acetyl-D-glucosamine                   | 13.37                 | 73, 147, 129, 87, 75, 117, 202, 103, 74, 205                         | 2.12              | 1.74 |
| Lactose                                  | 16.85                 | 73, 204, 147, 217, 103, 129, 205, 169, 117                           | 2.39              | 1.90 |
| Maltose                                  | 17.02                 | 73, 147, 204, 103, 217, 129, 361, 75, 169                            | 2.15              | 1.78 |
| Myo-inositol                             | 13.42                 | 73, 147, 217, 191, 305, 129, 74, 133                                 | 1.34              | 1.04 |
| <i><u>Fatty acids</u></i>                |                       |                                                                      |                   |      |
| Palmitic acid                            | 12.96                 | 117, 75, 73, 132, 129, 145, 55, 131, 118, 313                        | 1.80              | 1.51 |
| Linoleic acid                            | 14.01                 | 75, 73, 117, 129, 55, 67, 81, 95, 96, 79                             | 1.73              | 1.39 |
| Oleic acid                               | 14.02                 | 117, 129, 75, 73, 145, 55, 96, 354                                   | 1.82              | 1.50 |
| Linolenic acid                           | 14.05                 | 75, 79, 73, 67, 93, 95, 129, 117, 81, 335                            | 1.79              | 1.45 |
| Stearic acid                             | 14.14                 | 117, 75, 73, 132, 129, 145, 55, 131, 341                             | 1.74              | 1.46 |
| <i><u>Nucleotides</u></i>                |                       |                                                                      |                   |      |
| Uracil                                   | 7.71                  | 99, 73, 147, 241, 113, 255, 126, 100, 256                            | 0.44              | 0.97 |
| Cytosine                                 | 9.41                  | 73, 84, 75, 156, 147, 56, 98, 174, 74, 254, 240                      | 0.79              | 0.96 |

<sup>a</sup>Identified compounds: mass spectrum was consistent with those of standard compounds

<sup>b</sup>Retention time

<sup>c</sup>Variables were selected based on variable importance of projection (VIP1 or VIP2 > 0.7)

**Supplementary Table 2. Discriminative Secondary Metabolites analysed by UHPLC–Q-orbitrap-MS in doenjang made with three different herbs.**

| Tentative identification <sup>a</sup> | RT (min) <sup>b</sup> | posi | neg  | MW   | Elemental composition<br>[M+H] <sup>+</sup> | MS <sup>n</sup> fragment pattern (m/z) | VIP1 <sup>c</sup> | VIP2 |
|---------------------------------------|-----------------------|------|------|------|---------------------------------------------|----------------------------------------|-------------------|------|
| <i>Isolavones</i>                     |                       |      |      |      |                                             |                                        |                   |      |
| Acetylgenistin                        | 5.75                  | 475  | 473  | 474  | C23H23O11                                   | 475>457,379,313,270>242,215,152        | 1.31              | 0.97 |
| Glycitein                             | 5.91                  | 285  | 283  | 284  | C16H13O5                                    | 285>285,270>252,242,214,152            | 0.71              | 0.57 |
| Genistein                             | 6.43                  | 271  | 269  | 270  | C15H11O5                                    | 271>253,247,243,215>156,129,96         | 1.53              | 1.10 |
| <i>Soyasaponins</i>                   |                       |      |      |      |                                             |                                        |                   |      |
| Tetra-deacetyl-soyasaponin Ab         | 5.25                  | 1270 | 1268 | 1269 | C59H97O29                                   | -                                      | 0.62              | 1.58 |
| Di-deacetyl-soyasaponin Ab            | 5.70                  | 1354 | 1352 | 1353 | C63H101O31                                  | -                                      | 1.69              | 1.24 |
| Deacetyl-soyasaponin Ab               | 6.30                  | 1396 | 1394 | 1395 | C65H103O32                                  | -                                      | 1.03              | 1.26 |
| Soyasaponin Bd                        | 6.49                  | 958  | 956  | 957  | C48H77O19                                   | -                                      | 0.15              | 0.82 |
| Soyasaponin Bf                        | 6.58                  | 928  | 926  | 927  | C47H75O18                                   | 925>907,717,>567,511,471               | 0.07              | 0.89 |
| Soyasaponin Ab(A1)                    | 6.66                  | 1438 | 1436 | 1437 | C67H105O33                                  | 1436>1188>1026                         | 1.91              | 1.46 |
| Soyasaponin Ac                        | 6.73                  | 1422 | 1420 | 1421 | C67H105O32                                  | -                                      | 2.19              | 1.56 |
| Soyasaponin Af                        | 6.89                  | 1276 | 1274 | 1275 | C61H95O28                                   | 1273>1231,1189,749,605>473             | 2.08              | 1.55 |
| Soyasaponin Ba(V)                     | 7.08                  | 960  | 958  | 959  | C48H79O19                                   | 960>797, 599, 441 > 581, 423           | 0.59              | 0.93 |
| Soyasaponin Bb(I)                     | 7.21                  | 944  | 942  | 943  | C48H79O18                                   | 943>325,797,599>581,423,351            | 0.86              | 1.08 |
| Soyasaponin Bc(II)                    | 7.33                  | 914  | 912  | 913  | C47H77O17                                   | 911>893,765,457>437,371                | 0.93              | 0.68 |
| Soyasaponin Bb(III)                   | 7.37                  | 798  | 796  | 797  | C42H69O14                                   | 797>779,599,423,365>203                | 0.19              | 0.90 |
| Soyasaponin Bc(IV)                    | 7.47                  | 768  | 766  | 767  | C41H67O13                                   | 765>721,615,457                        | 0.06              | 1.34 |
| Soyasaponin Bb-DDMP(βg)               | 7.58                  | 1070 | 1068 | 1069 | C54H85O21                                   | 1068>968>822                           | 2.20              | 1.66 |
| Soyasaponin γg                        | 7.84                  | 924  | 922  | 923  | C48H74O17                                   | 922>822,642>464,598,484                | 2.21              | 1.63 |
| Soyasaponin Bc-DDMP(βa)               | 8.54                  | 1040 | 1038 | 1039 | C53H83O20                                   | -                                      | 0.34              | 0.83 |
| <i>Lysophospholipids</i>              |                       |      |      |      |                                             |                                        |                   |      |
| LysoPC18:3                            | 8.14                  | 518  | 516  | 517  | C26H49NO7P                                  | 518>500>162                            | 0.28              | 0.86 |
| LysoPC16:1                            | 8.24                  | 494  | 538  | 495  | C24H49NO7P                                  | 494>476                                | 1.17              | 1.85 |
| LysoPC18:2                            | 8.54                  | 520  | 518  | 519  | C26H51NO7P                                  | 520>502>323,184                        | 0.39              | 0.79 |
| LysoPE16:0                            | 8.72                  | 454  | 452  | 453  | C21H45NO7P                                  | 454>436>393                            | 0.17              | 1.51 |
| LysoPC16:0                            | 8.83                  | 540  | 496  | 497  | C24H51NO7P                                  | 496>478>419,125,86                     | 0.11              | 1.22 |
| LysoPC18:1                            | 9.05                  | 522  | 520  | 521  | C26H53NO7P                                  | 522>504>419,309                        | 0.16              | 0.98 |
| LysoPC18:0                            | 9.76                  | 524  | 522  | 523  | C26H55NO7P                                  | 524>506>311                            | 0.36              | 1.26 |

<sup>a</sup>Tentative identified metabolites

<sup>b</sup>Retention time

<sup>c</sup>Variables were selected based on variable importance of projection (VIP1 or VIP2 > 0.7)
